# Supplementary material for: Tree mycorrhizal type regulates leaf and needle microbial communities, affects microbial assembly and co-occurrence network patterns, and influences litter decomposition rates in temperate forest
Source: Frontiers journal article supplement (doi:10.3389/fpls.2023.1239600), 2023-11-29

## Supplementary Material

**Tree mycorrhizal type regulates leaf and needle microbial communities, affects microbial assembly and co-occurrence network patterns, and influences litter decomposition rates in temperate forest.**

Benjawan Tanunchai<sup>1,2,3¶</sup>, Li Ji<sup>1,4¶</sup>, Simon Andreas Schroeter<sup>5</sup>, Sara Fareed Mohamed Wahdan<sup>1,6</sup>, Katikarn Thongsuk<sup>1</sup>, Ines Hilke<sup>5</sup>, Gerd Gleixner<sup>5</sup>, François Buscot<sup>1,7</sup>, Ernst-Detlef Schulze<sup>5</sup>, Matthias Noll<sup>2,3\*</sup>, Witoon Purahong<sup>1\*</sup>

<sup>1</sup>Department of Soil Ecology, UFZ-Helmholtz Centre for Environmental Research, Theodor-Lieser-Str. 4, 06120 Halle (Saale), Germany.

<sup>2</sup>Institute of Bioanalysis, Coburg University of Applied Sciences and Arts, Coburg, Germany.

<sup>3</sup>Bayreuth Center of Ecology and Environmental Research (BayCEER), University of Bayreuth, Bayreuth, Germany.

<sup>4</sup>School of Forestry, Central South of Forestry and Technology, 410004, Changsha, P.R. China.

<sup>5</sup>Max Planck Institute for Biogeochemistry, Biogeochemical Processes Department, Hans-Knöll-Str. 10, 07745 Jena, Germany.

<sup>6</sup>Department of Botany and Microbiology, Faculty of Science, Suez Canal University, 41522 Ismailia, Egypt.

<sup>7</sup>German Centre for Integrative Biodiversity Research (iDiv), Halle-Jena-Leipzig, Deutscher Platz 5e, 04103 Leipzig, Germany.

**\*Correspondence:** [benjawan.tanunchai@hs-coburg.de](mailto:benjawan.tanunchai@hs-coburg.de); [witoon.purahong@ufz.de](mailto:witoon.purahong@ufz.de); [witoon.purahong@gmail.com](mailto:witoon.purahong@gmail.com); [Matthias.noll@hs-coburg.de](mailto:Matthias.noll@hs-coburg.de); Tel.: 09561-317645

**¶ These authors contributed equally to this work**

## Material and methods

### Study site, experimental setup, designs

Additional details of the study site are provided in this Supplementary Material. Briefly, the characteristics of this site are elevations from 100 to 494 m.a.s.l., average annual precipitation from 600 to 800 mm, average annual temperatures from 6 to 7.5 °C, average temperature in January = 0.65°C and July = 17.17°C. The main soil type is Cambisol on limestone as bed rock with an average soil pH of  $5.1 \pm 1.1$ ; mean  $\pm$  SD. Most sites are covered by a litter layer consisting mainly of past years foliage (1 to 3 cm), followed by a Pleistocene loess layer of variable thickness (ca. 10–50 cm), underlain by Triassic limestone parent material. All the analyses are summarized in the experimental scheme.

### Experimental scheme

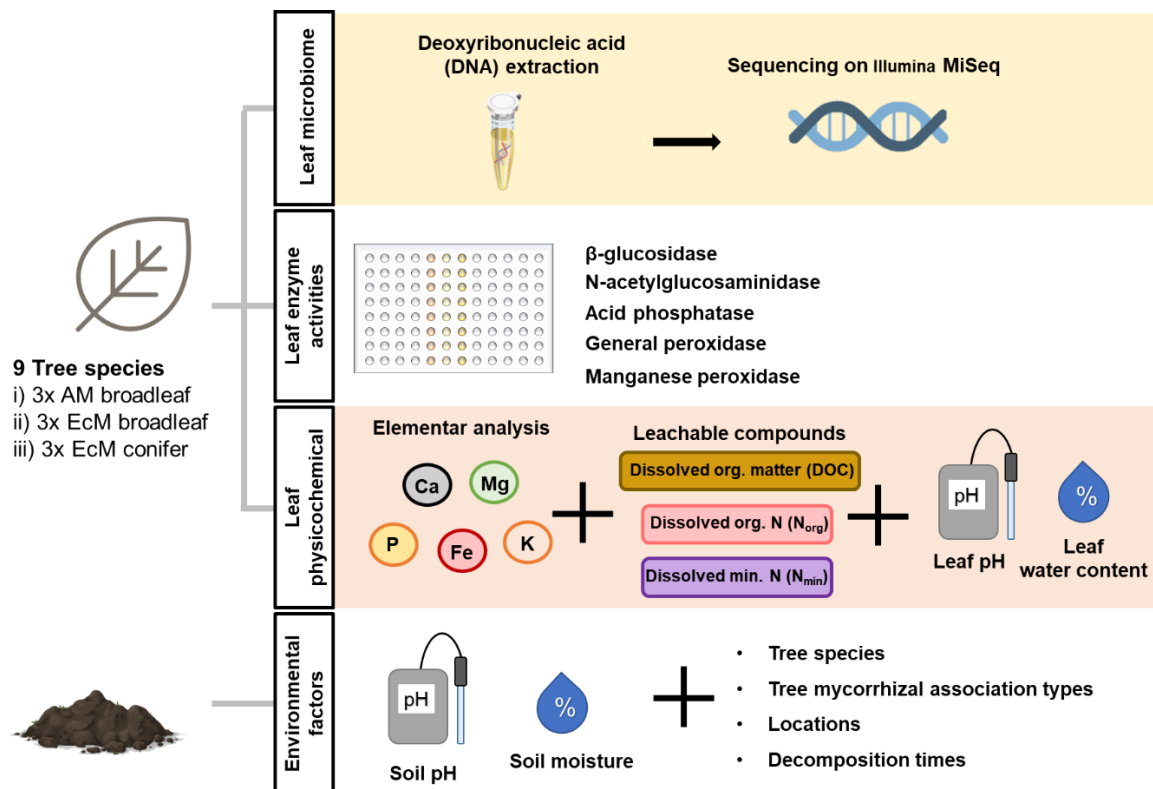

## **Physiochemical analyses**

The procedures for the physiochemical analyses were published by Tanunchai et al. (2022a) and are presented in the Supplementary Material. Briefly, leachable components were extracted by incubating wet leaf and needle samples in 30 mL MilliQ water for 1 h at room temperature, centrifuging for 5 min at  $2889 \times g$ , decanting, and filtering through pre-flushed 0.45  $\mu\text{m}$  regenerated cellulose syringe filters. The dry weight, pH, and water content of the leaves and needles were measured after two weeks of oven drying at 40 °C. All quantification results are presented in reference to the dry weight. Total leaf C (C), total leaf N (N), nutrient (including Ca, Fe, K, Mg, and P content), dissolved organic C (DOC), dissolved organic N ( $N_{\text{org}}$ ), and dissolved inorganic N ( $N_{\text{min}}$ ) contents were analyzed.  $N_{\text{Min}}$ , ammonium-N, nitrite-N, and nitrate-N, including nitrite-N, were quantified using a flow injection analyzer (Quikchem QC85S5; Lachat Instruments, Hach Company, Loveland CO, USA). DOC was measured using a sum parameter analyzer with high-temperature combustion and infrared detection (Vario TOC cube, Elementar Analysensysteme GmbH, Langenselbold, Germany). Nutrient ions and Ca, Fe, K, Mg, and P contents were quantified using inductively coupled plasma optical emission spectrometry (ICP–OES, PerkinElmer Inc., Waltham, MA, USA). More details on the physicochemical analyses have been published by Tanunchai et al., 2022a.

## **Enzyme analyses**

Five potential enzyme activities, including three hydrolytic enzymes ( $\beta$ -glucosidase, N-acetylglucosaminidase, and acid phosphatase) and two oxidative enzymes, including peroxidase and manganese peroxidase (Purahong et al., 2016b), were measured from homogenized leaf litter samples (0.1 g wet weight). Hydrolytic and oxidative enzyme activities were measured using a fluorometric microplate assay (TECAN Infinite F200Pro, Grödig, Austria) with 4-

methylumbelliferone (MUF) (Sigma-Aldrich, Steinheim, Germany) and 3,3',5,5'-tetramethylbenzidine (TMB) (Sigma-Aldrich)-labeled substrates, respectively, as described previously (Purahong et al., 2016a). The leaf samples were weighed in wet weight, but all enzyme activity results were later calculated and given in reference to the leaf dry weight.

### **DNA extraction, Illumina sequencing, and bioinformatics**

Mature leaves and needles (0 day), healthy leaves (up to 10 leaves per tree individual, depending on leaf size), and needles (from five branches per tree individual) were subsampled and prepared for DNA extraction. For decomposing leaves and needles at 200 and 400 days of incubation, 1 g of leaves and needles were subsampled. The leaf and needle samples were washed and DNA was extracted using the DNeasy PowerSoil Kit (Qiagen, Hilden, Germany). The presence and amount of DNA were checked using a NanoDrop ND-1000 spectrophotometer (Thermo Fisher Scientific, Dreieich, Germany), and the extracts were stored at  $-20^{\circ}\text{C}$ .

For the library preparation, the polymerase chain reactions (PCR) were performed using 20  $\mu\text{L}$  reaction volumes with 5 $\times$  HOT FIRE Pol Blend Master Mix (Solis BioDyne, Tartu, Estonia) on ABI Veriti thermocyclers (Applied Biosystems, Carlsbad, CA, USA). The bacterial polymerase chain reaction (PCR) conditions were as follows:  $95^{\circ}\text{C}$  for 15 min, followed by 30 cycles of  $95^{\circ}\text{C}$  for 20 s,  $56^{\circ}\text{C}$  for 30 s,  $72^{\circ}\text{C}$  for 1 min, followed by one extension cycle at  $72^{\circ}\text{C}$  for 5 min, and a  $4^{\circ}\text{C}$  hold. The fungal PCR conditions were  $95^{\circ}\text{C}$  for 15 min, followed by 30 cycles of  $95^{\circ}\text{C}$  for 20 s,  $54^{\circ}\text{C}$  for 40 s, and  $72^{\circ}\text{C}$  for 1 min, followed by one extension cycle at  $72^{\circ}\text{C}$  for 10 min, and a  $4^{\circ}\text{C}$  hold. The amplified products were visualized using gel electrophoresis. Amplification products (three replicate reactions per sample) were pooled in equimolar amounts and purified using an Agencourt AMPure XP kit (Beckman Coulter, Krefeld, Germany). Illumina Nextera XT Indices were added at both ends of the fungal amplicons. Paired-end sequencing ( $2 \times 300$  bp) was

performed at the Department of Soil Ecology, Helmholtz Centre for Environmental Research, Germany.

## **Bioinformatics**

Assembled reads fulfilling the following criteria were retained for further analyses: a minimum length of bacterial forward sequences of 200 nucleotides (nt) and bacterial reverse sequences of 150 nt, a minimum length of fungal forward and reverse sequences of 70 nt, quality scores at least equal to 15 (bacteria) and 9 (fungi), with a maximum expected error score of 5 for forward and reverse sequences, and no ambiguous nucleotides. Merging was conducted with two mismatches allowed, and a minimum overlap of 20 nucleotides was required for bacterial and fungal sequences. High-quality reads were clustered into amplicon sequence variants (ASVs). The SILVA SSU database v. 138 was used for taxonomic classification of bacterial ASVs (Yilmaz et al., 2014). Fungal ASVs were classified against the UNITE v7.2 database (Kõljalg et al., 2013). The set of ASVs was classified using the Bayesian classifier, as implemented in the *mothur* *classify.seqs* command, with a cut-off of 60. Rare ASVs (singletons) were excluded. The datasets were then rarefied to the minimum sequencing depth of the bacterial and fungal sequence reads. The rarefaction curves of all samples reached saturation (Figure provided below). The Mantel test based on the Bray–Curtis distance measure with 999 permutations was applied to evaluate the correlation between the whole matrix and a rarefied matrix for the bacterial and fungal datasets (Tanunchai et al., 2022b).

*Rarefaction curves of both bacterial and fungal datasets.*

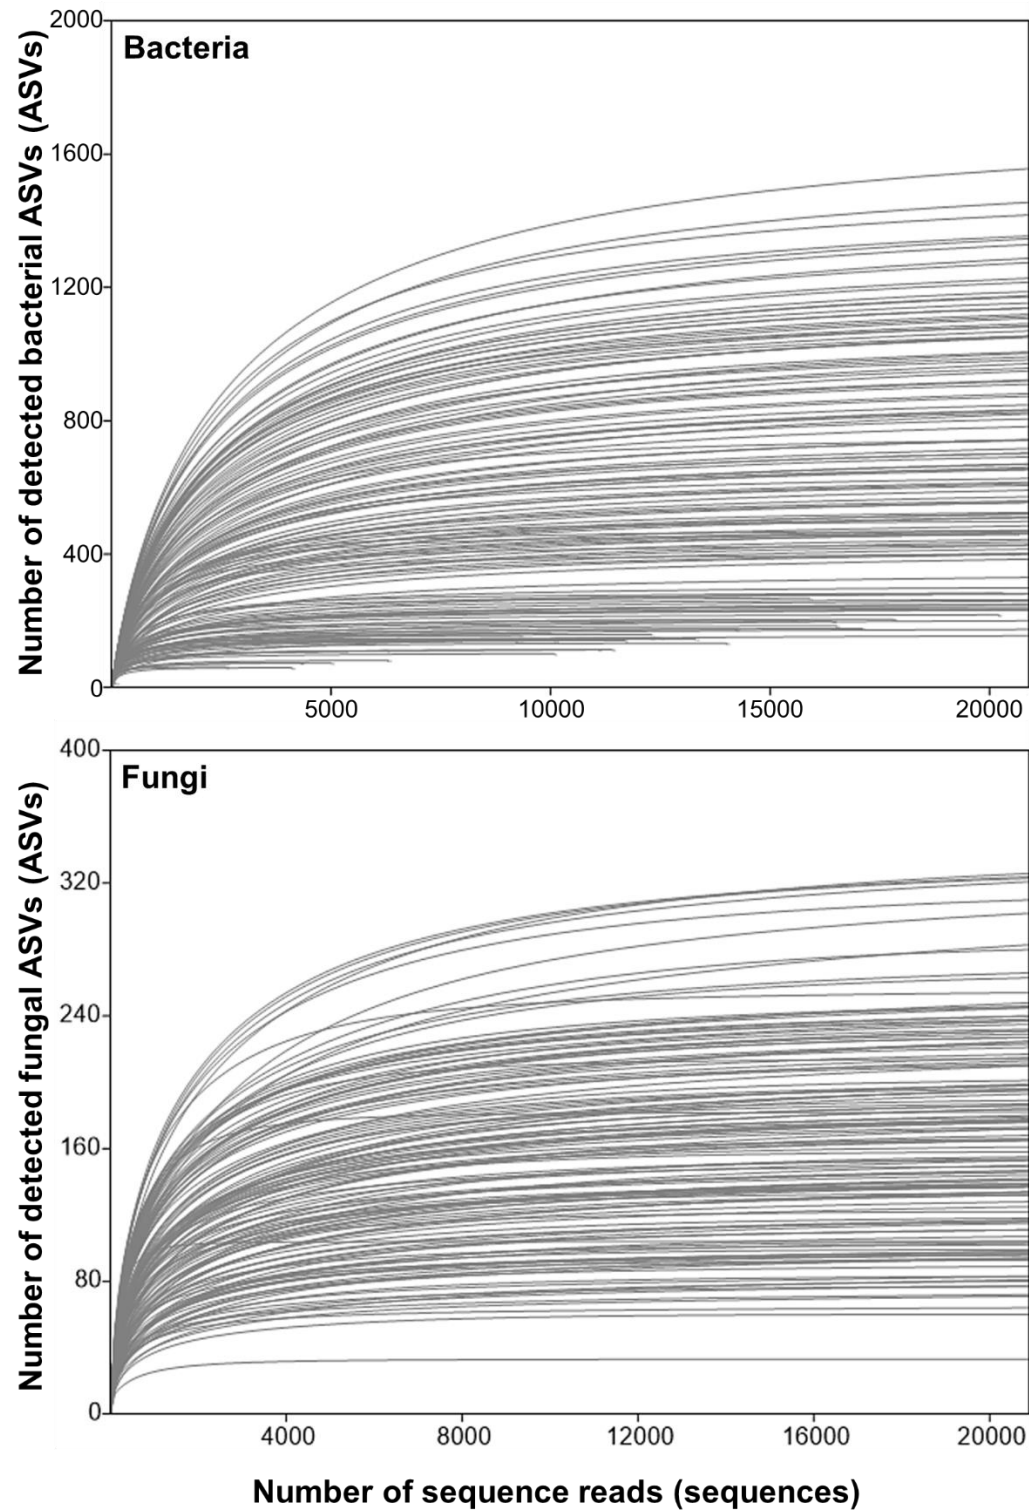

## Network and community assembly analyses

The connectivity of each node was calculated based on its within-module connectivity ( $Z_i$ ) and among-module connectivity ( $P_i$ ) to identify the keystone species according to Olesen et al., 2007. Four criteria of node topologies were identified: (1) module hubs (highly connected nodes within modules,  $Z_i > 2.5$ ); (2) network hubs (highly connected nodes within the entire network,  $Z_i > 2.5$  and  $P_i > 0.62$ ); (3) connectors (nodes connecting modules,  $P_i > 0.62$ ), and (4) peripherals (interconnected nodes in modules with few outside connections,  $Z_i < 2.5$  and  $P_i < 0.62$ ). All networks were visualized using Gephi v0.9.2. All above mentioned parameters were calculated by 'iCAMP' package in R with the code provided by (Ning et al., 2020) (<https://github.com/DaliangNing/iCAMP1>).

## Results

### *General overview of the leaf and needle microbiome in forest ecosystems*

Mature (0 day) and decomposing (early stage 200 and late stage 400 days) leaves and needles of nine temperate tree species were colonized by 14,773 bacterial and 4,884 fungal ASVs (belonging to 585 bacterial and 594 fungal genera). The bacterial classes; Alphaproteobacteria (30.5 – 42.7% relative sequence read abundance, represented by *Sphingomonas*, uncultivated *Beijerinckiaceae* [1174-901-12], and *Brevundimonas*), Grammaproteobacteria (21.5 – 31.7% relative sequence read abundance, represented by *Massilia*, *Pseudomonas*, and *Variovorax*), Bacteroidia (19.3 – 23.1% relative sequence read abundance, represented by *Hymenobacter*, *Pedobacter*, and *Flavobacterium*), and Actinobacteria (6.9 – 11.1% relative sequence read abundance, represented by *Microbacteriaceae*) formed the backbone in mature and decomposing leaves and needles of all tree mycorrhizal species and decomposition stages (Fig. S1 and Table S2). Nevertheless, the patterns of these backbone bacterial classes differentiated in broadleaved arbuscular (AM\_BL),

broadleaved ectomycorrhizal (EcM\_BL), and coniferous ectomycorrhizal (EcM\_C) trees, and shifted during leaf litter decomposition (Fig. S1). Remarkably, N-fixing bacteria ( *Sphingomonas*, *Pseudomonas*, *Allorhizobium-Neorhizobium-Pararhizobium-Rhizobium*, and *Methylobacterium-Methylobacterium*) dominated the bacterial community composition across the tree mycorrhizal types over the decomposition time (Fig. S1). Aerobic Chemoheterotrophy was the most detected bacterial function (up to 85% relative sequence read abundance) across tree mycorrhizal types and decomposition time (Figure below).

The fungal community composition in mature and decomposing leaves and needles of all tree mycorrhizal types was dominated by the fungal phylum Ascomycota. Dothideomycetes (24.1 – 41.1% relative sequence read abundance, represented by *Alternaria*, *Aureobasidium*, and *Cladosporium*) and Leotiomyces (26.6 – 42.0% relative sequence read abundance, represented by *Hymenoscyphus*, *Tetracladium*, and *Mollisia*), followed by Sordariomycetes (8.6 – 24.5% relative sequence read abundance, represented by *Chaetomium* and *Fusidium*) dominated the fungal community composition in leaves and needles of AM\_BL, EcM\_BL, and EcM\_C trees across the decomposition time. The fungal class Tremellomycetes (9.4 % relative abundance, represented by *Vishniacozyma*) in the phylum Basidiomycota substantially contributed to the fungal community composition in mature leaves (0 day) of AM\_BL and EcM\_BL trees, which was later replaced by the fungal class Agaricomycetes (6.9 – 8.5% relative sequence read abundance, represented by *Mycena*) in the early (200 days) and late (400 days) stages of leaf litter decomposition. The pattern of fungal community composition in the needles of EcM\_C trees differed from that in the leaves of AM\_BL and EcM\_BL trees. In the mature needles (0 day) of EcM\_C trees, fungal classes in the fungal phyla Ascomycota and Eurotiomycetes (18.2% relative sequence read abundance, represented by *Chaetothyriales*) and Dothideomycetes (37.4% relative



sequence read abundance, represented by *Cladosporium* and *Phoma*) dominated the fungal community composition (Fig. S3 and Table S3). The relative sequence read abundance of Dothideomycetes increased with decomposition time (60.0% and 63.0% relative sequence read abundance at 200 days and at 400 days, respectively) and Eurotiomycetes was replaced by members of the fungal class Agaricomycetes (9.4% and 13.3% relative sequence read abundance at 200 and 400 days, represented by *Mycena*) in the phylum Basidiomycota. Saprotrophic and plant pathogenic fungi were dominant across all comparisons, regardless of tree mycorrhizal type and decomposition time (Figure below).

**Relative proportions of functional groups of bacteria (a – c) and fungi (d – f). Subfigures show the functional groups of bacteria and fungi in different tree species (a, d), tree mycorrhizal types (b, e), and sampling times (c, f). Colored circles behind functional group names indicate significant differences.**

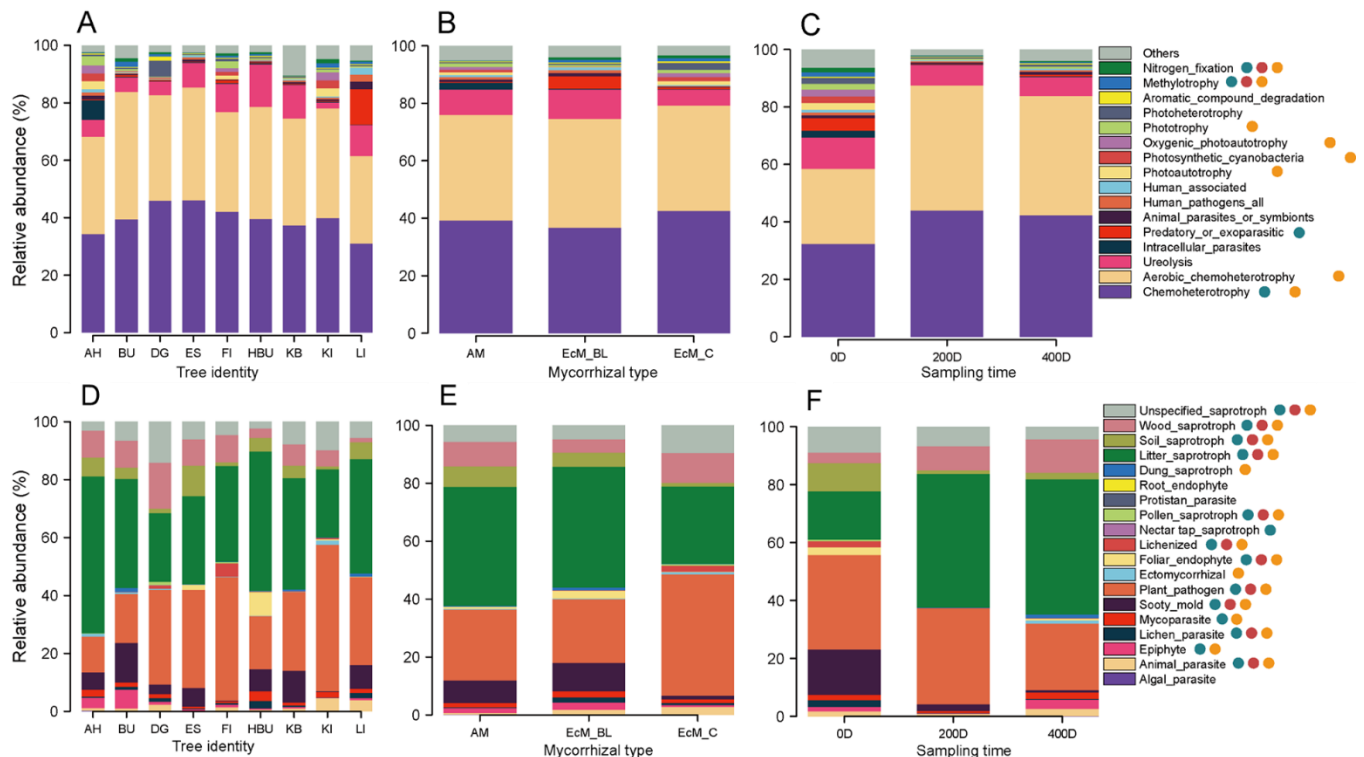

**Enzyme activities and their links to microbial communities**

Hydrolytic enzyme activity was significantly higher in the leaves of AM\_BL and EcM\_BL trees than in the needles of EcM\_C trees (Fig. S5). The oxidative enzyme activities in the leaves and needles of different tree mycorrhizal types were low or almost absent after 200 days of decomposition (Fig. S5). The activities of both hydrolytic and oxidative enzymes significantly increased across tree mycorrhizal types at 400 days of decomposition (Fig. S5).

Overall, the bacterial and fungal community compositions were correlated with both hydrolytic and oxidative enzyme activities (Table S9). At 200 days of decomposition, the bacterial community composition in the leaves of the AM\_BL and EcM\_BL trees was correlated with hydrolytic enzyme activities ( $R^2 = 0.55 - 0.93$ ,  $P < 0.05 - 0.001$ , Table S9). No significant correlation between bacterial community composition and enzyme activities was observed in the needles of EcM\_C trees at 200 days (Table S9). At 400 days of decomposition, the bacterial community composition in leaves and needles across all tree mycorrhizal types was moderately to highly correlated with both hydrolytic and oxidative enzyme activities ( $R^2 = 0.60 - 0.90$ ,  $P < 0.01 - 0.001$ , Table S9). While the correlation between bacterial community composition and enzyme activities showed different patterns across decomposition times, the correlations between fungal community composition were rather consistent, especially when considering EcM\_BL and EcM\_C trees (Table S9).

## **Discussion**

### ***Link between enzyme activities and microbial communities***

Further discussion of the relationship between enzyme activity and the microbial community is discussed here. Brown rot and ascomycetous fungi dominated the fungal community composition in mature (0 day) and decomposing leaves and needles at 200 days. The leaves of AM\_BL and

EcM\_BL trees were dominated by *Aureobasidium* in the fungal community composition, which was later replaced by *Alternaria*, *Chaetomium*, and Leotiomycetes groups, *Hymenoscyphus*, *Mollisia*, and *Tetracladium* after 200 days of decomposition (Fig. S3). Members of the Leotiomycetes group are specialists in decomposing biopolymers (such as cellulose, hemicellulose, pectin, and chitin) and produce cellulase enzymes (Schneider et al., 2012). Needles of EcM\_C trees were mainly colonized by different groups of ascomycetous fungi (*Cladosporium*, *Herpotrichia*, and *Phoma*) after 200 days of decomposition (Fig. S3). White rot fungi, especially *Mycena*, become enriched after 200 days of decomposition. *Mycena* is a lignin decomposer that secretes laccase and manganese peroxidase (Miyamoto et al., 2000; Kellner et al., 2014; Purahong et al., 2016b). Although fungi are known for their important role in decomposing complex biopolymers, bacteria may play direct and indirect roles in leaf litter decomposition (de Gonzalo et al., 2016; Purahong et al., 2016b). We found that the mass loss of different tree mycorrhizal types was directly related to the presence of some bacterial functional groups, specifically N-fixing bacteria. We observed that the mass loss of needles of EcM\_C trees after 200 days of decomposition was significantly lower than that of leaves from AM\_BL and EcM\_BL trees (Fig. 2). We found that on 0 day (mature leaves and needles), N-fixing bacteria, *Massilia*, *Methylobacterium-Methylorubrum*, *Pseudomonas*, and *Sphingomonas* were highly abundant in senescing leaves of AM\_BL and EcM\_BL trees, whereas *Sphingomonas* was abundant in the senescing needles of the EcM\_C tree (Fig. S2). *Pseudomonas* dominated the bacterial community composition at 200 days of decomposition, while *Sphingomonas* co-dominated. *Pseudomonas* has been reported to be both an N-fixing bacterium and to produce another type of peroxidase, bacterial DyP-type peroxidases, that modify lignin (de Gonzalo et al., 2016; Desnoues et al., 2003). Saprotrophic fungi require available N to produce exoenzymes for leaf litter decomposition

(Hoppe et al., 2014; Purahong et al., 2016b). Thus, N availability may be the rate-limiting step in leaf litter decomposition (Osono and Takeda, 2005). The high mass loss at 400 days (up to 89%) was coupled with an increase in enzyme activity, especially oxidative enzyme activity. Although hydrolytic enzymes are important for the acquisition of polymeric C ( $\beta$ -glucosidase), N (N-acetylglucosaminidase), and P (acid phosphatase), the two oxidative enzymes (general peroxidase and manganese peroxidase) are responsible for the modification or breakdown of complex biopolymers such as lignin. (Purahong et al., 2016b). This is consistent with the enrichment of *Mycena*, which has been reported to decompose lignin (Miyamoto et al., 2000; Kellner et al., 2014; Purahong et al., 2016b). Furthermore, we found a link between oxidative enzyme activity and the bacterial community at 400 days (Fig. S5). Bacteria may not directly secrete the measured oxidative enzymes; however, some bacteria (such as *Sphingobium* and *Novosphingobium*) have been reported to secrete glutathione-dependent enzymes ( $\beta$ -etherases and lyases) that act on the lignin degradation process (de Gonzalo et al., 2016).

## References

- de Gonzalo, G., Colpa, D. I., Habib, M. H. M., and Fraaije, M. W. (2016). Bacterial enzymes involved in lignin degradation. *Journal of Biotechnology* 236, 110–119. doi: 10.1016/j.jbiotec.2016.08.011.
- Desnoues, N., Lin, M., Guo, X., Ma, L., Carreño-Lopez, R., and Elmerich, C. (2003). Nitrogen fixation genetics and regulation in a *Pseudomonas stutzeri* strain associated with rice. *Microbiology* 149, 2251–2262. doi: 10.1099/mic.0.26270-0.
- Hoppe, B., Kahl, T., Karasch, P., Wubet, T., Bauhus, J., Buscot, F., et al. (2014). Network analysis reveals ecological links between N-fixing bacteria and wood-decaying fungi. *PLoS ONE* 9, e88141. doi: 10.1371/journal.pone.0088141.
- Kellner, H., Luis, P., Pecyna, M. J., Barbi, F., Kapturska, D., Krüger, D., et al. (2014). Widespread occurrence of expressed fungal secretory peroxidases in forest soils. *PLoS ONE* 9, e95557. doi: 10.1371/journal.pone.0095557.

- Kõljalg, U., Nilsson, R. H., Abarenkov, K., Tedersoo, L., Taylor, A. F. S., Bahram, M., et al. (2013). Towards a unified paradigm for sequence-based identification of fungi. *Mol Ecol* 22, 5271–5277. doi: 10.1111/mec.12481.
- Miyamoto, T., Igarashi, T., and Takahashi, K. (2000). Lignin-degrading ability of litter-decomposing basidiomycetes from *Picea* forests of Hokkaido. *Mycoscience* 41, 105–110. doi: 10.1007/BF02464317.
- Ning, D., Yuan, M., Wu, L., Zhang, Y., Guo, X., Zhou, X., et al. (2020). A quantitative framework reveals ecological drivers of grassland microbial community assembly in response to warming. *Nat Commun* 11, 4717. doi: 10.1038/s41467-020-18560-z.
- Olesen, J. M., Bascompte, J., Dupont, Y. L., and Jordano, P. (2007). The modularity of pollination networks. *PNAS* 104, 19891–19896. doi: 10.1073/pnas.0706375104.
- Osono, T., and Takeda, H. (2005). Decomposition of organic chemical components in relation to nitrogen dynamics in leaf litter of 14 tree species in a cool temperate forest. *Ecological Research* 20, 41–49. doi: <https://doi.org/10.1007/s11284-004-0002-0>.
- Purahong, W., Durka, W., Fischer, M., Dommert, S., Schöps, R., Buscot, F., et al. (2016a). Tree species, tree genotypes and tree genotypic diversity levels affect microbe-mediated soil ecosystem functions in a subtropical forest. *Scientific Reports* 6, 36672. doi: 10.1038/srep36672.
- Purahong, W., Wubet, T., Lentendu, G., Schloter, M., Pecyna, M. J., Kapturska, D., et al. (2016b). Life in leaf litter: novel insights into community dynamics of bacteria and fungi during litter decomposition. *Mol Ecol* 25, 4059–4074. doi: 10.1111/mec.13739.
- Schneider, T., Keiblinger, K. M., Schmid, E., Sterflinger-Gleixner, K., Ellersdorfer, G., Roschitzki, B., et al. (2012). Who is who in litter decomposition? Metaproteomics reveals major microbial players and their biogeochemical functions. *ISME J* 6, 1749–1762. doi: 10.1038/ismej.2012.11.
- Tanunchai, B., Ji, L., Schroeter, S. A., Wahdan, S. F. M., Hossen, S., Delelegn, Y., et al. (2022a). FungalTraits vs. FUNGuild: comparison of ecological functional assignments of leaf- and needle-associated fungi across 12 temperate tree species. *Microb Ecol.* 85, 411–428 doi: 10.1007/s00248-022-01973-2.
- Tanunchai, B., Ji, L., Schroeter, S. A., Wahdan, S. F. M., Larpkern, P., Lehnert, A.-S., et al. (2022b). A poisoned apple: First insights into community assembly and networks of the fungal pathobiome of healthy-looking senescing leaves of temperate trees in mixed forest ecosystem. *Front. Plant Sci.* 13. doi: <https://doi.org/10.3389/fpls.2022.968218>.
- Yilmaz, P., Parfrey, L. W., Yarza, P., Gerken, J., Pruesse, E., Quast, C., et al. (2014). The SILVA and “All-species Living Tree Project (LTP)” taxonomic frameworks. *Nucleic Acids Res* 42, D643–D648. doi: 10.1093/nar/gkt1209.

**Table S1** Bacterial richness at different rarefaction depths. The abbreviations are AH: *Acer pseudoplatanus*, BU: *Fagus sylvatica*, DG: *Pseudotsuga menziesii*, ES: *Fraxinus excelsior*, FI: *Picea abies*, HBU: *Carpinus betulus*, KI: *Pinus sylvestris*, KB: *Prunus avium*, and LI: *Tilia cordata*.

| Tree species | Sequence reads | Rarification depths |       |       |      |      |      |      |      |
|--------------|----------------|---------------------|-------|-------|------|------|------|------|------|
|              |                | 20000               | 15000 | 10000 | 6000 | 4000 | 2500 | 2000 | 1000 |
| FI4          | 20787          | 459                 | 456   | 446   | 430  | 406  | 365  | 350  | 267  |
| FI3          | 20676          | 397                 | 394   | 384   | 371  | 354  | 327  | 320  | 244  |
| KI1          | 20479          | 283                 | 282   | 277   | 265  | 258  | 239  | 229  | 179  |
| BU1          | 20309          | 218                 | 216   | 212   | 205  | 197  | 181  | 174  | 144  |
| AH3          | 17946          | 205                 | 205   | 200   | 195  | 188  | 168  | 167  | 137  |
| ES4          | 17287          | 177                 | 177   | 173   | 163  | 156  | 147  | 135  | 121  |
| DG3          | 16602          | 185                 | 183   | 182   | 174  | 167  | 147  | 149  | 131  |
| HBU2         | 16550          | 199                 | 198   | 193   | 183  | 176  | 161  | 153  | 131  |
| KI5          | 16051          | 268                 | 268   | 265   | 254  | 248  | 233  | 224  | 190  |
| HBU1         | 15672          | 203                 | 203   | 200   | 192  | 179  | 164  | 154  | 129  |
| HBU4         | 14329          | 175                 | 175   | 172   | 165  | 153  | 145  | 143  | 116  |
| ES2          | 14187          | 133                 | 133   | 132   | 129  | 122  | 117  | 114  | 94   |
| DG5          | 13413          | 145                 | 145   | 144   | 144  | 144  | 139  | 139  | 124  |
| AH5          | 12693          | 148                 | 148   | 146   | 144  | 136  | 135  | 120  | 113  |
| DG4          | 12499          | 147                 | 147   | 146   | 147  | 142  | 140  | 130  | 115  |
| KI3          | 12436          | 159                 | 159   | 157   | 155  | 150  | 143  | 140  | 123  |
| LI5          | 11861          | 141                 | 141   | 141   | 134  | 132  | 123  | 120  | 101  |
| LI3          | 11660          | 146                 | 146   | 144   | 140  | 131  | 128  | 126  | 113  |
| KB2          | 11521          | 114                 | 114   | 113   | 110  | 108  | 105  | 92   | 89   |
| ES1          | 11208          | 113                 | 113   | 113   | 109  | 110  | 97   | 99   | 86   |
| LI4          | 10249          | 101                 | 101   | 101   | 99   | 97   | 96   | 91   | 85   |
| AH4          | 10204          | 140                 | 140   | 140   | 136  | 131  | 130  | 119  | 102  |
| KI2          | 10145          | 164                 | 164   | 164   | 161  | 157  | 144  | 140  | 116  |
| AH2          | 9493           | 156                 | 156   | 156   | 152  | 147  | 136  | 135  | 114  |
| KI4          | 9335           | 141                 | 141   | 141   | 139  | 138  | 132  | 132  | 112  |
| ES3          | 6426           | 81                  | 81    | 81    | 80   | 78   | 74   | 75   | 65   |
| LI1          | 6402           | 110                 | 110   | 110   | 109  | 109  | 104  | 99   | 95   |
| FI4.400      | 5160           | 186                 | 186   | 186   | 186  | 186  | 180  | 177  | 155  |
| KB5          | 5129           | 74                  | 74    | 74    | 74   | 72   | 69   | 71   | 64   |
| KB1          | 4479           | 74                  | 74    | 74    | 74   | 74   | 72   | 71   | 66   |
| ES5          | 4274           | 59                  | 59    | 59    | 59   | 59   | 59   | 56   | 55   |
| KB3          | 2733           | 62                  | 62    | 62    | 62   | 62   | 62   | 62   | 58   |

**Table S2** Information on the relative abundance (%) of bacterial ASVs detected in mature (0 day) and decomposing (200 and 400 days) leaves and needles in forest ecosystems (see accompanying Excel file).

**Table S3** Information on the relative abundance (%) of fungal ASVs detected in mature (0 day) and decomposing (200 and 400 days) leaves and needles in forest ecosystems (see accompanying Excel file).

**Table S4.** Absolute number of reads of some bacteria and fungi.

**Table S5** Comparisons between bacterial (a) and fungal (b) community compositions associated with mature (0 day) and decomposing (200 and 400 days) leaves and needles in forest ecosystems using analysis of similarities (ANOSIM) and non-parametric multivariate analysis of variance (NPMANOVA) based on relative abundance data and the Bray-Curtis distance measure (see accompanying Excel file).

**Table S6.** Effects of time and forest mycorrhizal type on leaf mass loss, microbial ASV richness, and physicochemical properties. Statistical differences were tested using repeated measures analysis of variance (ANOVA) with Fisher's Least Significant Difference (LSD) post-hoc test. Bold letters indicate statistical significance.

|                    | Tree mycorrhizal type                |                                     |                                     |
|--------------------|--------------------------------------|-------------------------------------|-------------------------------------|
|                    | Time                                 | Mycorrhizal type                    | Time x mycorrhizal type             |
| Leaf mass loss     | $F = 195.68$<br>$P < \mathbf{0.001}$ | $F = 15.58$<br>$P < \mathbf{0.001}$ | $F = 7.45$<br>$P = \mathbf{0.002}$  |
| Bacterial richness | $F = 568.93$<br>$P < \mathbf{0.001}$ | $F = 9.26$<br>$P < \mathbf{0.001}$  | $F = 12.54$<br>$P < \mathbf{0.001}$ |
| Fungal richness    | $F = 1.70$<br>$P = 0.200$            | $F = 5.20$<br>$P = \mathbf{0.010}$  | $F = 35.67$<br>$P < \mathbf{0.001}$ |
| Leaf water content | $F = 58.99$<br>$P < \mathbf{0.001}$  | $F = 32.25$<br>$P < \mathbf{0.001}$ | $F = 3.26$<br>$P = \mathbf{0.048}$  |
| Leaf pH            | $F = 36.31$<br>$P < \mathbf{0.001}$  | $F = 15.21$<br>$P < \mathbf{0.001}$ | $F = 3.62$<br>$P = \mathbf{0.035}$  |
| C                  | $F = 77.82$<br>$P < \mathbf{0.001}$  | $F = 47.45$<br>$P < \mathbf{0.001}$ | $F = 6.58$<br>$P = \mathbf{0.003}$  |
| DOC                | $F = 130.05$<br>$P < \mathbf{0.001}$ | $F = 21.71$<br>$P < \mathbf{0.001}$ | $F = 30.48$<br>$P < \mathbf{0.001}$ |
| N                  | $F = 139.97$<br>$P < \mathbf{0.001}$ | $F = 1.52$<br>$P = 0.232$           | $F = 0.79$<br>$P = 0.460$           |
| N <sub>min</sub>   | $F = 87.64$<br>$P < \mathbf{0.001}$  | $F = 8.70$<br>$P < \mathbf{0.001}$  | $F = 4.34$<br>$P = \mathbf{0.020}$  |
| N <sub>org</sub>   | $F = 24.94$<br>$P < \mathbf{0.001}$  | $F = 7.93$<br>$P = \mathbf{0.001}$  | $F = 24.53$<br>$P < \mathbf{0.001}$ |
| C: N ratio         | $F = 148.05$<br>$P < \mathbf{0.001}$ | $F = 4.01$<br>$P = \mathbf{0.025}$  | $F = 0.52$<br>$P = 0.596$           |
| C: P ratio         | $F = 2.52$<br>$P = 0.120$            | $F = 17.41$<br>$P < \mathbf{0.001}$ | $F = 1.89$<br>$P = 0.163$           |
| N: P ratio         | $F = 79.83$<br>$P < \mathbf{0.001}$  | $F = 31.07$<br>$P < \mathbf{0.001}$ | $F = 3.93$<br>$P = \mathbf{0.027}$  |
| Ca                 | $F = 15.65$<br>$P < \mathbf{0.001}$  | $F = 26.60$<br>$P < \mathbf{0.001}$ | $F = 0.10$<br>$P = 0.910$           |
| Fe                 | $F = 194.26$<br>$P < \mathbf{0.001}$ | $F = 55.97$<br>$P < \mathbf{0.001}$ | $F = 2.17$<br>$P = \mathbf{0.127}$  |
| K                  | $F = 6.53$<br>$P = \mathbf{0.014}$   | $F = 1.23$<br>$P = 0.304$           | $F = 5.94$<br>$P = \mathbf{0.005}$  |
| Mg                 | $F = 0.31$<br>$P = 0.581$            | $F = 16.11$<br>$P < \mathbf{0.001}$ | $F = 6.19$<br>$P = \mathbf{0.004}$  |
| P                  | $F = 12.60$<br>$P < \mathbf{0.001}$  | $F = 18.15$<br>$P < \mathbf{0.001}$ | $F = 9.26$<br>$P < \mathbf{0.001}$  |



**Table S7** Topological properties of modular networks of leaf/needle-associated microbes.

| Network features  |                                        | 0 day                |                      |                      | 200 days             |                      |                      | 400 days             |                      |                      |
|-------------------|----------------------------------------|----------------------|----------------------|----------------------|----------------------|----------------------|----------------------|----------------------|----------------------|----------------------|
|                   |                                        | AM                   | EcM_<br>BL           | EcM_<br>C            | AM                   | EcM_<br>BL           | EcM_<br>C            | AM                   | EcM_<br>BL           | EcM_<br>C            |
| Empirical network | Number of nodes                        | 167                  | 240                  | 210                  | 407                  | 436                  | 309                  | 467                  | 603                  | 468                  |
|                   | Number of links                        | 294                  | 410                  | 275                  | 665                  | 1020                 | 463                  | 488                  | 796                  | 613                  |
|                   | $R^2$ of power-law                     | 0.908                | 0.906                | 0.778                | 0.907                | 0.865                | 0.940                | 0.920                | 0.910                | 0.910                |
|                   | Number of positive correlations        | 206<br>(70.1<br>)    | 277<br>(67.6<br>)    | 208<br>(75.6<br>)    | 523<br>(78.6<br>)    | 855<br>(83.8<br>)    | 354<br>(76.5<br>)    | 340<br>(69.7<br>)    | 635<br>(79.8<br>)    | 425<br>(69.3<br>)    |
|                   | Number of negative correlations        | 88<br>(29.9<br>)     | 1338<br>(32.4<br>)   | 67<br>(24.4<br>)     | 142<br>(21.4<br>)    | 165<br>(16.2<br>)    | 109<br>(23.5<br>)    | 148<br>(30.3<br>)    | 161<br>(20.2<br>)    | 188<br>(30.7<br>)    |
|                   | Average degree (avgK)                  | 3.521                | 3.417                | 2.619                | 3.268                | 4.679                | 2.997                | 2.090                | 2.640                | 2.620                |
|                   | Average clustering coefficient (avgCC) | 0.178                | 0.196                | 0.185                | 0.113                | 0.195                | 0.106                | 0.048                | 0.101                | 0.147                |
|                   | Average path distance (GD)             | 5.553                | 7.106                | 8.34                 | 6.284                | 6.018                | 5.818                | 7.312                | 7.472                | 6.892                |
|                   | Modularity                             | 0.704                | 0.690                | 0.817                | 0.669                | 0.621                | 0.727                | 0.854                | 0.808                | 0.843                |
| Random network    | avgCC $\pm$ SD                         | 0.030 $\pm$<br>0.010 | 0.026 $\pm$<br>0.007 | 0.010 $\pm$<br>0.006 | 0.016 $\pm$<br>0.004 | 0.043 $\pm$<br>0.006 | 0.013 $\pm$<br>0.004 | 0.003 $\pm$<br>0.001 | 0.006 $\pm$<br>0.001 | 0.007 $\pm$<br>0.003 |
|                   | GD $\pm$ SD                            | 3.846 $\pm$<br>0.074 | 3.846 $\pm$<br>0.074 | 5.347 $\pm$<br>0.108 | 4.321 $\pm$<br>0.061 | 3.669 $\pm$<br>0.039 | 4.589 $\pm$<br>0.085 | 6.319 $\pm$<br>0.191 | 5.385 $\pm$<br>0.082 | 5.405 $\pm$<br>0.102 |
|                   | Modularity $\pm$ SD                    | 0.518 $\pm$<br>0.009 | 0.518 $\pm$<br>0.009 | 0.669 $\pm$<br>0.010 | 0.572 $\pm$<br>0.006 | 0.426 $\pm$<br>0.004 | 0.610 $\pm$<br>0.007 | 0.800 $\pm$<br>0.007 | 0.689 $\pm$<br>0.006 | 0.690 $\pm$<br>0.007 |
|                   |                                        |                      |                      |                      |                      |                      |                      |                      |                      |                      |

Note: AM: arbuscular mycorrhizal. EcM\_BL, broadleaf tree species belonging to the ectomycorrhizal association; EcM\_C, coniferous tree species belonging to the ectomycorrhizal association.

**Table S8** Goodness-of-fit statistics ( $R^2$ ) of environmental variables fitted to non-metric multidimensional scaling (NMDS) ordination of bacterial and fungal communities in (a) AM\_BL tree species, (b) EcM\_BL, and (c) EcM\_C based on relative abundance data and the Bray-Curtis distance measure. Bold letters indicate statistical significance with  $R^2 \geq 0.70$ . \*  $P < 0.05$ , \*\*  $P < 0.01$ , \*\*\*  $P < 0.001$ , NA = not applicable.

(a) AM\_BL

| Factors                                | All sampling times |                | 0 day          |                | 200 days |                | 400 days       |                |
|----------------------------------------|--------------------|----------------|----------------|----------------|----------|----------------|----------------|----------------|
|                                        | Bac                | Fun            | Bac            | Fun            | Bac      | Fun            | Bac            | Fun            |
| <b>Tree factors</b>                    |                    |                |                |                |          |                |                |                |
| Tree mycorrhizal type                  | NA                 | NA             | NA             | NA             | NA       | NA             | NA             | NA             |
| Tree species                           | 0.05               | 0.32***        | 0.55**         | <b>0.89***</b> | 0.60**   | <b>0.84***</b> | <b>0.77***</b> | <b>0.87***</b> |
| <b>Time factor</b>                     |                    |                |                |                |          |                |                |                |
| Sampling times                         | <b>0.90***</b>     | <b>0.87***</b> | NA             | NA             | NA       | NA             | NA             | NA             |
| <b>Plot factors</b>                    |                    |                |                |                |          |                |                |                |
| Soil water content                     | 0.05               | 0.33***        | 0.10           | 0.41*          | 0.09     | 0.22           | 0.24           | 0.43*          |
| Soil pH                                | 0.12               | 0.00           | 0.48*          | <b>0.81***</b> | 0.18     | 0.30           | 0.23           | 0.39           |
| Latitude                               | 0.01               | 0.09           | 0.02           | 0.02           | 0.18     | 0.24           | 0.09           | 0.13           |
| Longitude                              | 0.25**             | 0.12           | 0.19           | 0.15           | 0.42*    | 0.35           | 0.31           | 0.13           |
| <b>Leaf physicochemical properties</b> |                    |                |                |                |          |                |                |                |
| Leaf water content                     | 0.19*              | 0.18*          | 0.10           | 0.43*          | 0.29     | 0.29           | 0.06           | 0.09           |
| Leaf pH                                | 0.17*              | 0.16*          | 0.58**         | <b>0.90***</b> | 0.49*    | 0.54*          | <b>0.90***</b> | <b>0.83**</b>  |
| C                                      | 0.35**             | 0.33**         | 0.04           | 0.04           | 0.20     | 0.39           | 0.56**         | 0.28           |
| DOC                                    | <b>0.78***</b>     | 0.67***        | 0.10           | 0.14           | 0.30     | 0.20           | 0.09           | 0.09           |
| N                                      | 0.29***            | 0.20*          | 0.65**         | <b>0.70**</b>  | 0.33     | 0.47*          | 0.04           | 0.34           |
| N <sub>min</sub>                       | 0.17*              | 0.10           | <b>0.77***</b> | 0.55*          | 0.16     | 0.11           | 0.18           | 0.16           |
| N <sub>org</sub>                       | 0.53***            | 0.41***        | 0.13           | 0.02           | 0.42*    | 0.35           | 0.15           | 0.26           |
| C: N ratio                             | 0.52***            | 0.42***        | 0.68**         | 0.66**         | 0.47*    | 0.42*          | 0.07           | 0.28           |
| C: P ratio                             | 0.15*              | 0.10           | 0.38           | 0.40           | 0.24     | 0.05           | 0.54**         | 0.30           |
| N: P ratio                             | 0.27**             | 0.24***        | 0.01           | 0.11           | 0.31     | 0.06           | 0.53**         | 0.40*          |
| Ca                                     | 0.10               | 0.05           | 0.20           | 0.34           | 0.02     | 0.15           | 0.21           | 0.41*          |
| Fe                                     | 0.46***            | 0.38***        | 0.04           | 0.25           | 0.07     | 0.15           | 0.12           | 0.03           |
| K                                      | 0.07               | 0.15*          | 0.07           | 0.45*          | 0.21     | 0.02           | 0.24           | 0.23           |
| Mg                                     | 0.01               | 0.24**         | 0.47*          | 0.62**         | 0.27     | 0.63**         | 0.44*          | 0.31           |
| P                                      | 0.00               | 0.02           | 0.35           | 0.46*          | 0.14     | 0.26           | <b>0.70**</b>  | 0.52**         |

Table S8 Continued

(b) EcM\_BL

| Factors                                | All sampling times |                | 0 day          |                | 200 days       |                | 400 days       |                |
|----------------------------------------|--------------------|----------------|----------------|----------------|----------------|----------------|----------------|----------------|
|                                        | Bac                | Fun            | Bac            | Fun            | Bac            | Fun            | Bac            | Fun            |
| <b>Tree factors</b>                    |                    |                |                |                |                |                |                |                |
| Tree mycorrhizal type                  | NA                 | NA             | NA             | NA             | NA             | NA             | NA             | NA             |
| Tree species                           | 0.02               | 0.28***        | 0.60***        | <b>0.83***</b> | <b>0.82***</b> | <b>0.88***</b> | <b>0.87***</b> | <b>0.85***</b> |
| <b>Time factor</b>                     |                    |                |                |                |                |                |                |                |
| Sampling times                         | <b>0.81***</b>     | <b>0.86***</b> | NA             | NA             | NA             | NA             | NA             | NA             |
| <b>Plot factors</b>                    |                    |                |                |                |                |                |                |                |
| Soil water content                     | 0.06               | 0.05           | 0.31           | 0.20           | 0.25           | 0.10           | 0.06           | 0.07           |
| Soil pH                                | 0.45***            | 0.38***        | 0.63**         | <b>0.82**</b>  | <b>0.80***</b> | <b>0.88***</b> | <b>0.72**</b>  | 0.67**         |
| Latitude                               | 0.11               | 0.14*          | 0.20           | 0.21           | 0.16           | 0.23           | 0.14           | 0.13           |
| Longitude                              | 0.25**             | 0.33**         | 0.55*          | 0.51*          | 0.35           | 0.53**         | 0.33           | 0.33           |
| <b>Leaf physicochemical properties</b> |                    |                |                |                |                |                |                |                |
| Leaf water content                     | 0.14*              | 0.27**         | 0.32           | 0.25           | 0.35           | 0.11           | 0.29           | 0.17           |
| Leaf pH                                | 0.66***            | 0.47***        | 0.38           | <b>0.71**</b>  | 0.66**         | 0.64**         | 0.37           | 0.20           |
| C                                      | 0.45***            | 0.39***        | 0.68**         | 0.61**         | 0.18           | 0.24           | 0.22           | 0.32           |
| DOC                                    | <b>0.79***</b>     | 0.63***        | 0.42*          | 0.23           | 0.47*          | 0.48*          | 0.27           | 0.25           |
| N                                      | 0.39***            | 0.46***        | 0.47*          | 0.41*          | 0.06           | 0.63**         | 0.51*          | 0.35           |
| N <sub>min</sub>                       | 0.08               | 0.04           | <b>0.81***</b> | 0.63**         | 0.03           | 0.04           | 0.16           | 0.11           |
| N <sub>org</sub>                       | 0.43***            | 0.36**         | 0.64**         | 0.54**         | 0.09           | 0.13           | 0.23           | 0.23           |
| C: N ratio                             | 0.46***            | 0.50***        | 0.56*          | 0.50*          | 0.06           | 0.66***        | 0.51*          | 0.52*          |
| C: P ratio                             | 0.02               | 0.01           | 0.30           | 0.41*          | 0.33           | 0.07           | 0.44*          | 0.42           |
| N: P ratio                             | 0.16*              | 0.20**         | 0.32           | 0.59*          | 0.51**         | 0.12           | 0.44*          | 0.33           |
| Ca                                     | 0.24**             | 0.29**         | 0.35           | 0.58**         | 0.15           | 0.32           | 0.54*          | 0.54*          |
| Fe                                     | 0.43***            | 0.42***        | 0.15           | 0.12           | 0.10           | 0.07           | 0.46*          | 0.42*          |
| K                                      | 0.01               | 0.01           | 0.43*          | 0.11           | 0.38           | 0.28           | 0.31           | 0.43*          |
| Mg                                     | 0.21**             | 0.19*          | 0.50*          | 0.48*          | 0.53*          | 0.36*          | 0.12           | 0.32           |
| P                                      | 0.06               | 0.05           | 0.19           | 0.36           | 0.20           | 0.21           | 0.58*          | 0.33           |

**Table S8** Continued

(c) EcM\_C

| Factors                                | All sampling times |                | 0 day          |                | 200 days       |                | 400 days       |                |
|----------------------------------------|--------------------|----------------|----------------|----------------|----------------|----------------|----------------|----------------|
|                                        | Bac                | Fun            | Bac            | Fun            | Bac            | Fun            | Bac            | Fun            |
| <b>Tree factors</b>                    |                    |                |                |                |                |                |                |                |
| Tree mycorrhizal type                  | NA                 | NA             | NA             | NA             | NA             | NA             | NA             | NA             |
| Tree species                           | 0.02               | 0.38***        | <b>0.91***</b> | <b>0.94***</b> | 0.61**         | <b>1.00***</b> | <b>0.77***</b> | <b>0.97***</b> |
| <b>Time factor</b>                     |                    |                |                |                |                |                |                |                |
| Sampling times                         | <b>0.85***</b>     | <b>0.79***</b> | NA             | NA             | NA             | NA             | NA             | NA             |
| <b>Plot factors</b>                    |                    |                |                |                |                |                |                |                |
| Soil water content                     | 0.40***            | 0.18*          | 0.35           | 0.29           | 0.35           | 0.32           | 0.21           | 0.39*          |
| Soil pH                                | 0.22**             | 0.11           | <b>0.86***</b> | <b>0.90***</b> | 0.31           | <b>0.85***</b> | <b>0.76**</b>  | <b>0.87***</b> |
| Latitude                               | 0.20*              | 0.44***        | <b>0.88**</b>  | <b>0.94***</b> | 0.67**         | <b>1.00***</b> | 0.67**         | <b>0.97***</b> |
| Longitude                              | 0.01               | <b>0.79***</b> | <b>0.92***</b> | <b>0.96***</b> | <b>0.89***</b> | <b>1.00***</b> | 0.47*          | <b>0.97***</b> |
| <b>Leaf physicochemical properties</b> |                    |                |                |                |                |                |                |                |
| Leaf water content                     | 0.14*              | 0.01           | 0.15           | 0.33           | 0.06           | 0.03           | 0.28           | 0.52**         |
| Leaf pH                                | 0.39***            | 0.30***        | 0.51**         | 0.43*          | 0.17           | 0.35           | 0.32           | 0.34           |
| C                                      | 0.26**             | 0.26**         | <b>0.76**</b>  | <b>0.79***</b> | 0.22           | 0.69***        | 0.40*          | 0.44*          |
| DOC                                    | 0.25**             | 0.24**         | <b>0.83***</b> | <b>0.86***</b> | 0.61**         | 0.39           | 0.47*          | 0.24           |
| N                                      | 0.54***            | 0.62***        | 0.47*          | 0.19           | 0.69**         | 0.65**         | 0.35           | <b>0.82***</b> |
| N <sub>min</sub>                       | 0.27**             | 0.27***        | 0.48**         | 0.42*          | 0.37           | 0.33           | 0.42*          | 0.33           |
| N <sub>org</sub>                       | 0.31**             | 0.24**         | 0.32           | 0.44*          | 0.16           | 0.08           | 0.59**         | 0.41*          |
| C: N ratio                             | <b>0.73***</b>     | <b>0.75***</b> | 0.39           | 0.14           | 0.66**         | 0.58*          | 0.21           | <b>0.77***</b> |
| C: P ratio                             | 0.19*              | 0.36***        | 0.53*          | <b>0.70**</b>  | 0.28           | 0.12           | 0.25           | <b>0.70**</b>  |
| N: P ratio                             | 0.38***            | 0.59***        | <b>0.77**</b>  | <b>0.88**</b>  | 0.42*          | 0.27           | 0.29           | <b>0.82***</b> |
| Ca                                     | 0.22**             | 0.20**         | 0.40*          | 0.52**         | 0.12           | 0.52*          | <b>0.70***</b> | 0.68***        |
| Fe                                     | 0.29***            | 0.30***        | 0.14           | 0.18           | 0.06           | 0.07           | 0.18           | 0.02           |
| K                                      | 0.42***            | 0.51***        | 0.28           | 0.52**         | <b>0.71**</b>  | 0.63**         | 0.27           | 0.33           |
| Mg                                     | 0.12               | 0.10           | 0.04           | 0.02           | 0.04           | 0.02           | 0.18           | 0.29           |
| P                                      | 0.26**             | 0.39***        | 0.62**         | 0.80**         | 0.30           | 0.30           | 0.29           | <b>0.77***</b> |

**Table S9** Goodness-of-fit statistics ( $R^2$ ) of enzyme activities fitted to the non-metric multidimensional scaling (NMDS) ordination of bacterial and fungal communities in all tree mycorrhizal types, AM\_BL tree species, EcM\_BL, and EcM\_C based on relative abundance data and the Bray–Curtis distance measure. Bold letters indicate statistical significance with  $R^2 \geq 0.70$ .  
\*  $P < 0.05$ , \*\*  $P < 0.01$ , \*\*\*  $P < 0.001$ .

| <b>All tree mycorrhizal types</b> |                    |                |                |                |                |                |
|-----------------------------------|--------------------|----------------|----------------|----------------|----------------|----------------|
| Enzyme activities                 | All sampling times |                | 200 days       |                | 400 days       |                |
|                                   | Bac                | Fun            | Bac            | Fun            | Bac            | Fun            |
| β-glucosidase                     | 0.47***            | 0.23***        | 0.39***        | 0.28**         | 0.64***        | 0.67***        |
| N-acetylglucosaminidase           | 0.29***            | 0.10**         | 0.2**          | 0.06           | 0.23**         | 0.23**         |
| Acid phosphatase                  | 0.30***            | 0.40***        | 0.44***        | 0.34***        | 0.55***        | 0.63***        |
| General peroxidase                | 0.35***            | 0.07*          | 0.10           | 0.17*          | 0.01           | 0.12           |
| Manganese peroxidase              | 0.32***            | 0.03           | 0.05           | 0.10           | 0.20*          | 0.14*          |
| <b>AM_BL tree species</b>         |                    |                |                |                |                |                |
| Enzyme activities                 | All sampling times |                | 200 days       |                | 400 days       |                |
|                                   | Bac                | Fun            | Bac            | Fun            | Bac            | Fun            |
| β-glucosidase                     | 0.63***            | 0.04           | 0.55*          | 0.68**         | <b>0.79***</b> | <b>0.78***</b> |
| N-acetylglucosaminidase           | <b>0.71***</b>     | <b>0.75***</b> | <b>0.76***</b> | <b>0.87***</b> | <b>0.83***</b> | <b>0.89***</b> |
| Acid phosphatase                  | <b>0.77***</b>     | 0.65***        | <b>0.75***</b> | <b>0.86***</b> | <b>0.83***</b> | <b>0.95***</b> |
| General peroxidase                | 0.66***            | 0.40***        | 0.10           | 0.55*          | <b>0.80***</b> | <b>0.92***</b> |
| Manganese peroxidase              | 0.56***            | 0.26**         | 0.17           | 0.46*          | <b>0.84***</b> | <b>0.95***</b> |
| <b>EcM_BL tree species</b>        |                    |                |                |                |                |                |
| Enzyme activities                 | All sampling times |                | 200 days       |                | 400 days       |                |
|                                   | Bac                | Fun            | Bac            | Fun            | Bac            | Fun            |
| β-glucosidase                     | 0.68***            | 0.12           | <b>0.93***</b> | <b>0.92***</b> | 0.65**         | <b>0.85***</b> |
| N-acetylglucosaminidase           | 0.64***            | <b>0.75***</b> | 0.66***        | <b>0.86***</b> | <b>0.90***</b> | <b>0.85***</b> |
| Acid phosphatase                  | 0.33**             | 0.33**         | 0.37           | <b>0.87***</b> | 0.65**         | <b>0.85***</b> |
| General peroxidase                | <b>0.81***</b>     | 0.01           | 0.28           | <b>0.83***</b> | 0.67***        | <b>0.83***</b> |
| Manganese peroxidase              | 0.66***            | 0.18           | 0.25           | <b>0.84***</b> | <b>0.90***</b> | <b>0.85***</b> |
| <b>EcM_C tree species</b>         |                    |                |                |                |                |                |
| Enzyme activities                 | All sampling times |                | 200 days       |                | 400 days       |                |
|                                   | Bac                | Fun            | Bac            | Fun            | Bac            | Fun            |
| β-glucosidase                     | 0.30*              | 0.32**         | 0.30           | <b>0.85***</b> | <b>0.74**</b>  | <b>0.97***</b> |
| N-acetylglucosaminidase           | 0.53***            | 0.13           | 0.41           | <b>0.99***</b> | <b>0.88***</b> | <b>0.98***</b> |
| Acid phosphatase                  | <b>0.73***</b>     | 0.42**         | 0.28           | <b>0.90***</b> | 0.60**         | <b>0.97**</b>  |
| General peroxidase                | 0.61***            | 0.34**         | 0.28           | <b>0.92***</b> | <b>0.80***</b> | <b>0.98***</b> |
| Manganese peroxidase              | <b>0.76***</b>     | 0.18           | 0.28           | <b>0.98***</b> | 0.62**         | <b>0.97***</b> |

**Figure S1.** Composition of the bacterial community (at class-level (a) and genus-level (b), considering only classes and genera with relative sequence read abundances  $\geq 1\%$ , the rest of the bacterial classes and genera were pooled as “others”) associated with leaf and needle decomposition based on relative abundance. The abbreviations are AM\_BL: broadleaved arbuscular mycorrhizal trees (including AH: *Acer pseudoplatanus*, ES: *Fraxinus excelsior*, and KB: *Prunus avium*), EcM\_BL: broadleaved ectomycorrhizal trees (including BU: *Fagus sylvatica*, HBU: *Carpinus betulus*, and LI: *Tilia cordata*), and EcM\_C: coniferous ectomycorrhizal trees (including FI: *Picea abies*, KI: *Pinus sylvestris*, and DG: *Pseudotsuga menziesii*).

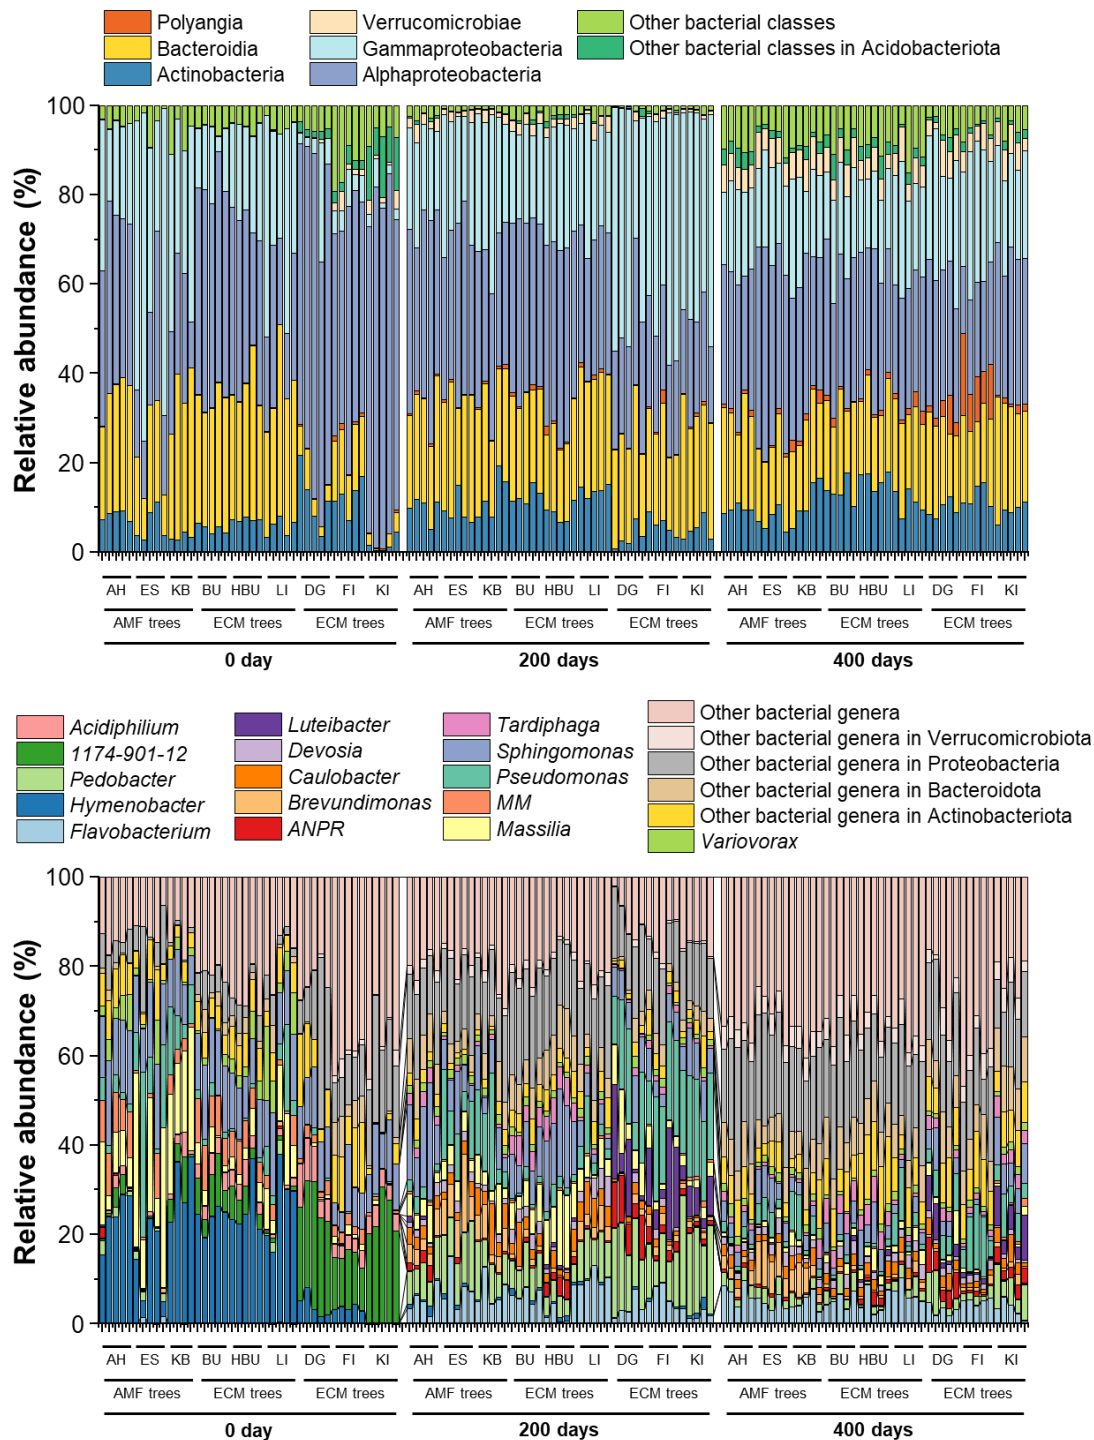

**Figure S2** Top-50 bacterial ASVs with the highest relative abundance among all treatments. Treatment abbreviations are AM\_BL: broadleaved arbuscular mycorrhizal trees (including AH: *Acer pseudoplatanus*, ES: *Fraxinus excelsior*, and KB: *Prunus avium*), EcM\_BL: broadleaved ectomycorrhizal trees (including BU: *Fagus sylvatica*, HBU: *Carpinus betulus*, and LI: *Tilia cordata*), and EcM\_C: coniferous ectomycorrhizal trees (including FI: *Picea abies*, KI: *Pinus sylvestris*, and DG: *Pseudotsuga menziesii*).

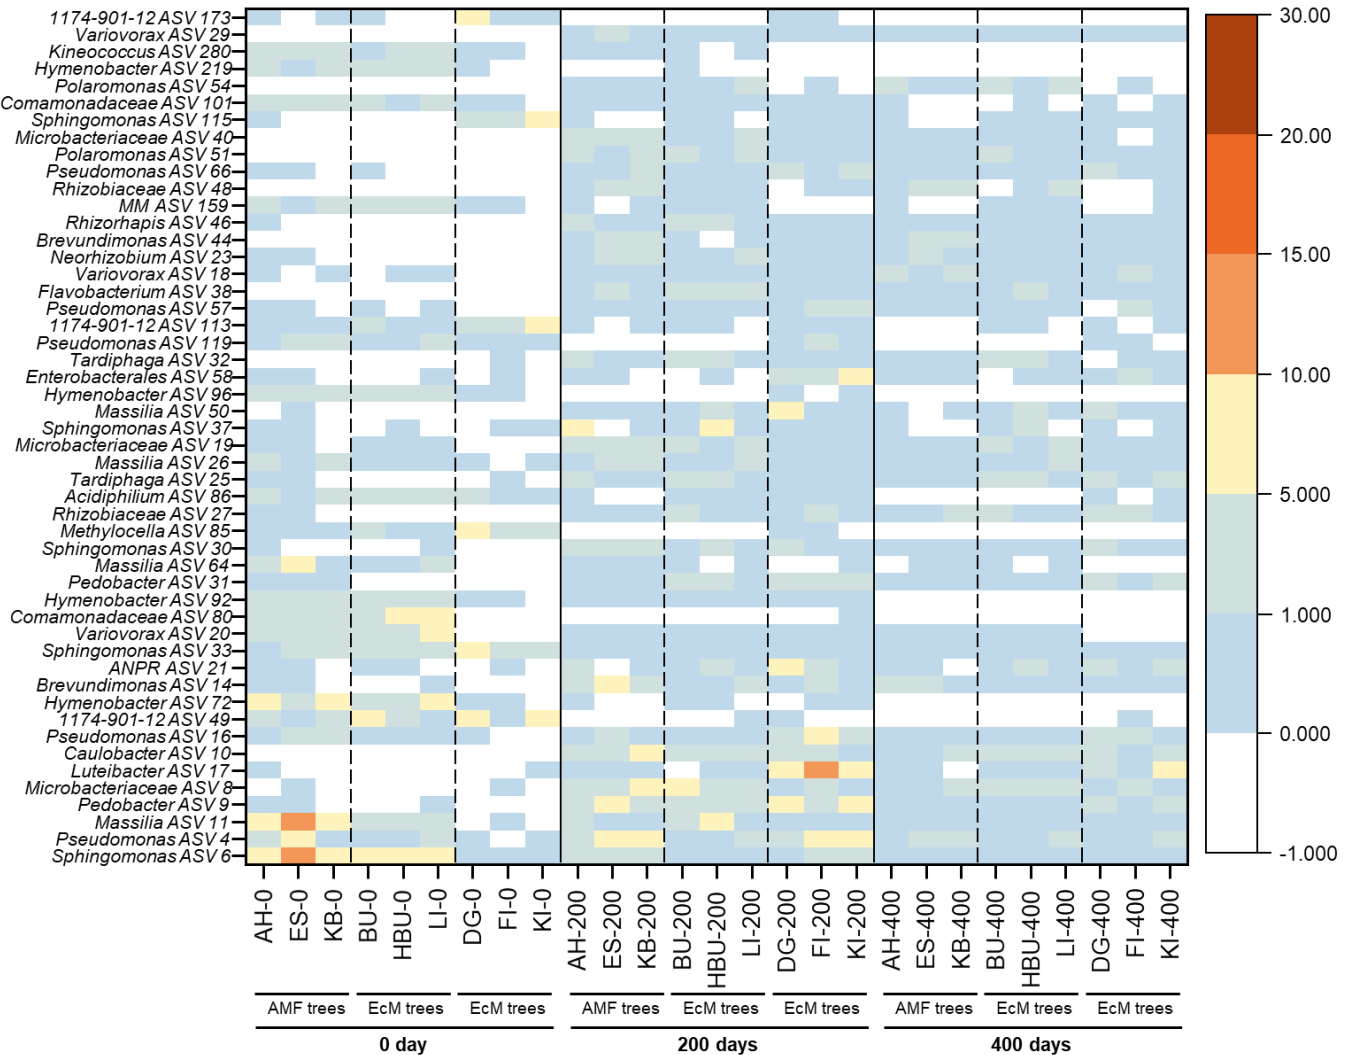

**Figure S3.** The composition of the fungal community (at class-level (a) and genus-level (b), considering only classes and genera with relative sequence read abundances  $\geq 1\%$ , the rest of the fungal classes and genera were pooled as “others”) associated with leaf and needle decomposition based on relative abundance. The abbreviations used are shown in Fig. 1.

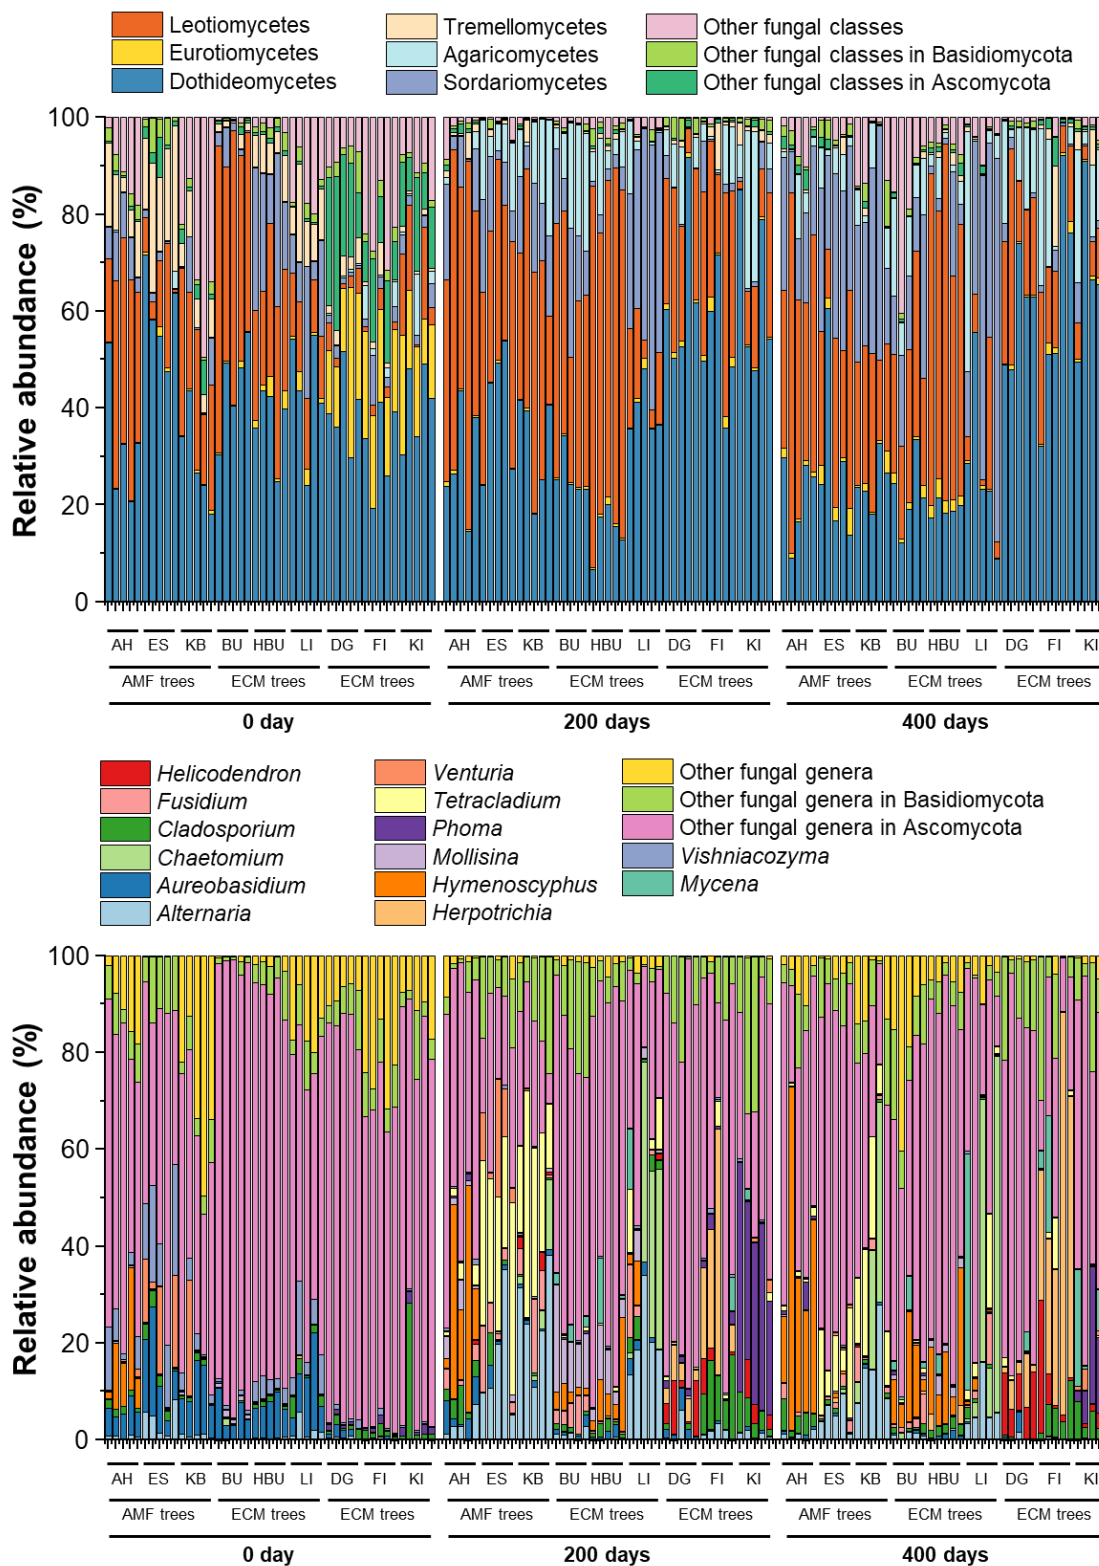



**Figure S4** Top-50 fungal ASVs with the highest relative abundance across all treatments. The details of the treatment abbreviations can be found in the legend of Fig. 1.

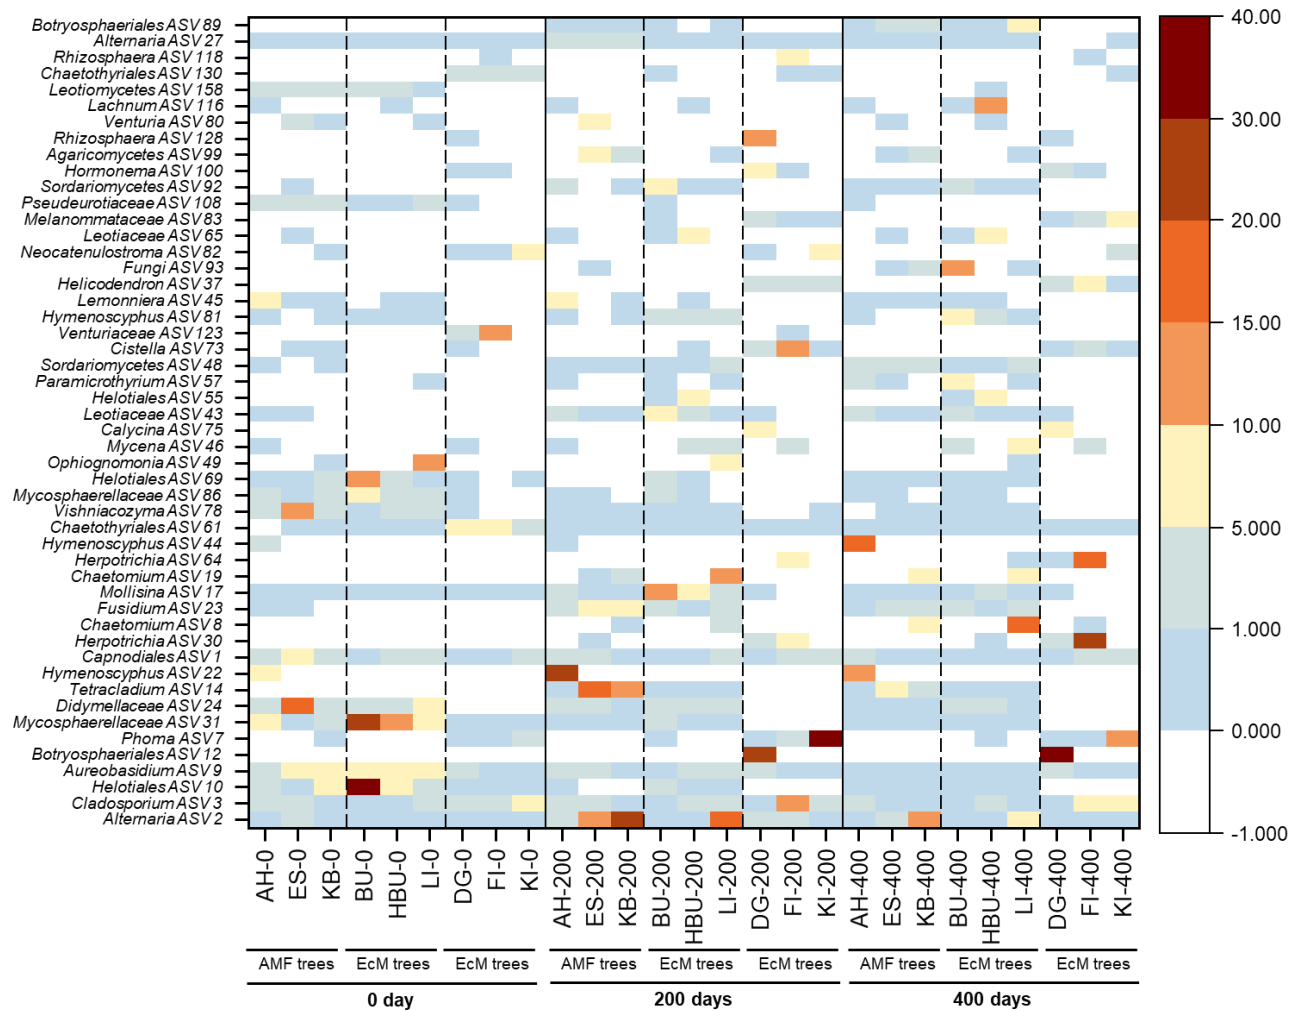

**Figure S5.** Hydrolytic ( $\beta$ -glucosidase, N-acetylglucosaminidase, and acid phosphatase) and oxidative (PO: general peroxidase and PER: manganese peroxidase) enzyme activities in decomposing leaves and needles from 200 and 400 days. Results are expressed in  $\text{nmol hr}^{-1} \text{g dry leaf}^{-1}$ . Details of the treatment abbreviations are provided in the legend of Fig. 1.

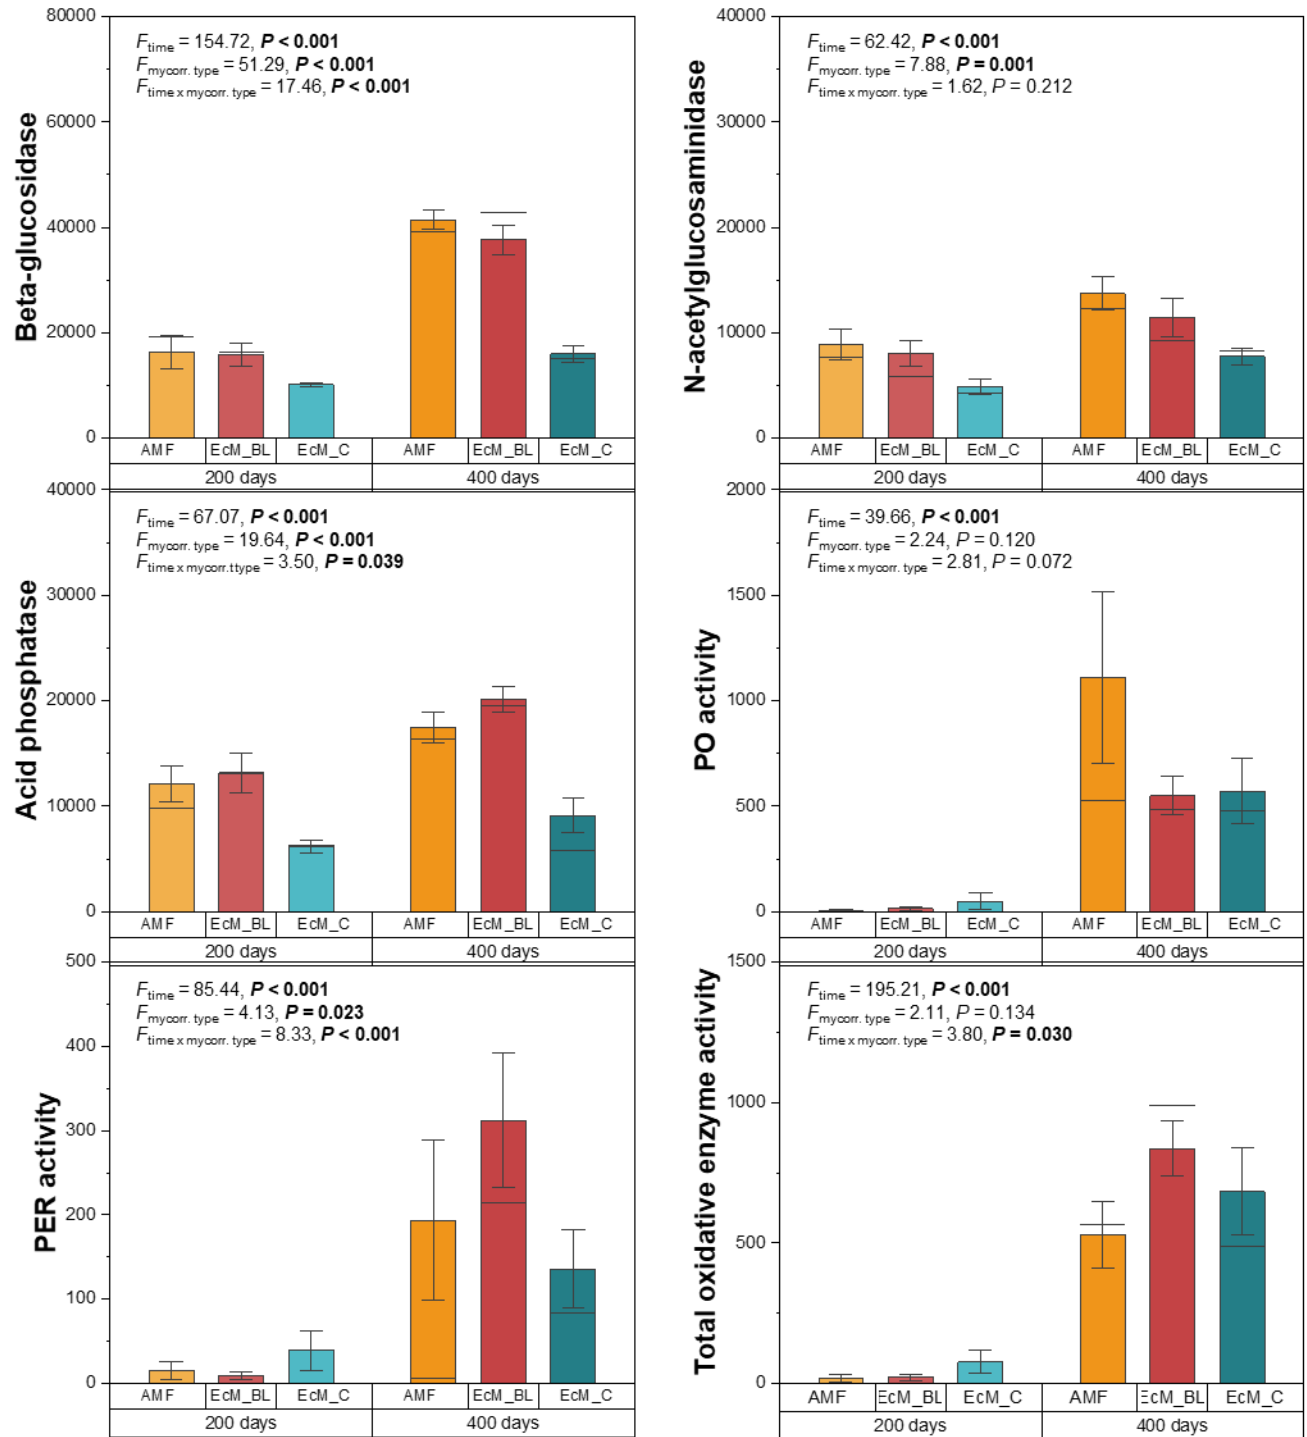

Supplement: Data_Sheet_1.zip [file Data_Sheet_1.zip]
